# Supplementary material
Source: PubMed Central journal article supplement (PMC3024469)
Supplement: NIHMS259590-supplement-1_si_001.pdf [file NIHMS259590-supplement-1_si_001.pdf]

## Supporting Information for:

# Heparin mapping using heparin lyases and the generation of a novel low molecular weight heparin

Zhongping Xiao<sup>†,‡</sup>, Britney R. Tappen<sup>§</sup>, Mellisa Ly<sup>‡</sup>, Wenjing Zhao<sup>1</sup>, Lauren P. Canova<sup>1</sup>, Huashi Guan<sup>\*,†</sup>, and Robert J. Linhardt<sup>\*,‡,1,1</sup>

<sup>†</sup>Key Laboratory of Marine Drugs, Chinese Ministry of Education, Institute of Marine Drug and Food, Ocean University of China, Qingdao, 266003, China; <sup>‡</sup>Departments of Chemistry and Chemical Biology, <sup>§</sup>Department of Biochemistry and Biophysics, <sup>1</sup>Department of Biology, and <sup>1</sup>Department of Chemical and Biological Engineering, Center for Biotechnology and Interdisciplinary Studies, Rensselaer Polytechnic Institute, Troy, NY, 12180, USA

\*To whom correspondence should be addressed: Robert J. Linhardt: Tel: +1 518-276-3404; fax: +1 518-276-3405; E-mail: [linhar@rpi.edu](mailto:linhar@rpi.edu) and Huashi Guan: [hsguan@ouc.edu.cn](mailto:hsguan@ouc.edu.cn).

| Table of contents |                                                                                                                                                                 | Page       |
|-------------------|-----------------------------------------------------------------------------------------------------------------------------------------------------------------|------------|
| <b>Table S1</b>   | SAX-HPLC Peak Area Integration of Major Oligosaccharide Compositions in Heparins Digested by Heparin lyase 1, Heparin lyase 2 and Heparin lyase 3, respectively | <b>S2</b>  |
| <b>Table S2</b>   | <sup>1</sup> H and <sup>13</sup> C chemical shifts for the tetrasaccharide standards                                                                            | <b>S3</b>  |
| <b>Table S3</b>   | Molecular Weight and Activity Assay of Heparin and Low Molecular Weight Heparin                                                                                 | <b>S7</b>  |
| <b>Figure S1</b>  | PAGE analysis of untreated heparins and heparin lyases treated heparins                                                                                         | <b>S8</b>  |
| <b>Figure S2</b>  | Chromatogram of heparins treated by heparin lyases                                                                                                              | <b>S9</b>  |
| <b>Figure S3</b>  | PAGE and SAX-HPLC analysis of oligosaccharides treated by heparin lyase 3                                                                                       | <b>S10</b> |
| <b>Figure S4</b>  | Structures and Mass Spectra of <b>4i</b> and <b>4e</b>                                                                                                          | <b>S11</b> |
| <b>Figure S5</b>  | PAGE analysis and 1D NMR spectra of the new low molecular weight heparin and the heparin control                                                                | <b>S12</b> |

**Table S1** SAX-HPLC Peak Area Integration of Major Oligosaccharide Compositions in Heparins Digested by Heparin lyase 1, Heparin lyase 2 and Heparin lyase 3, respectively

|           | Hp1   | Hp2   | Hp3   | Hp4   | Hp5   | Hp6   | Hp7   | Ave   | STDE |
|-----------|-------|-------|-------|-------|-------|-------|-------|-------|------|
|           | (%)   | (%)   | (%)   | (%)   | (%)   | (%)   | (%)   | (%)   | VA   |
|           | (%)   | (%)   | (%)   | (%)   | (%)   | (%)   | (%)   | (%)   | (%)  |
| Heparin   |       |       |       |       |       |       |       |       |      |
| lyase 1   |       |       |       |       |       |       |       |       |      |
| <b>2a</b> | 0.87  | 0.86  | 0.75  | 0.78  | 0.77  | 0.81  | 0.79  | 0.80  | 0.05 |
| <b>2b</b> | 1.22  | 1.01  | 1.18  | 0.99  | 1.05  | 1.08  | 1.15  | 1.10  | 0.09 |
| <b>2c</b> | 4.44  | 4.65  | 4.51  | 4.55  | 3.99  | 4.11  | 3.98  | 4.32  | 0.30 |
| <b>2d</b> | 80.40 | 79.7  | 79.08 | 80.07 | 80.89 | 80.58 | 80.85 | 80.22 | 0.70 |
| <b>4a</b> | 0.32  | 0.40  | 0.43  | 0.40  | 0.39  | 0.44  | 0.41  | 0.40  | 0.04 |
| <b>4b</b> | 2.55  | 3.01  | 3.22  | 2.45  | 2.56  | 2.59  | 2.44  | 2.69  | 0.30 |
| <b>4c</b> | 8.96  | 9.01  | 9.54  | 9.44  | 9.11  | 9.03  | 8.97  | 9.15  | 0.20 |
| <b>4d</b> | 0.99  | 1.05  | 1.08  | 1.07  | 1.06  | 1.17  | 1.21  | 1.09  | 0.08 |
| <b>6a</b> | 0.29  | 0.31  | 0.21  | 0.25  | 0.18  | 0.19  | 0.20  | 0.23  | 0.05 |
| Heparin   |       |       |       |       |       |       |       |       |      |
| lyase 2   |       |       |       |       |       |       |       |       |      |
| <b>2a</b> | 0.93  | 0.89  | 0.97  | 0.98  | 0.95  | 1.10  | 1.02  | 0.98  | 0.07 |
| <b>2b</b> | 15.5  | 14.50 | 15.30 | 14.90 | 15.20 | 15.10 | 13.50 | 14.86 | 0.70 |
| <b>2c</b> | 9.10  | 9.00  | 10.10 | 8.90  | 8.10  | 7.90  | 7.40  | 8.64  | 0.90 |
| <b>2d</b> | 61.60 | 62.02 | 60.54 | 63.24 | 62.29 | 64.13 | 65.97 | 62.83 | 1.8  |
| <b>2e</b> | 3.51  | 3.31  | 3.49  | 3.41  | 3.11  | 2.99  | 2.89  | 3.24  | 0.30 |
| <b>2f</b> | 3.11  | 2.99  | 3.08  | 3.02  | 3.01  | 2.70  | 3.09  | 3.00  | 0.10 |
| <b>2g</b> | 1.44  | 1.69  | 1.72  | 1.71  | 1.70  | 2.10  | 1.79  | 1.74  | 0.20 |
| <b>2h</b> | 1.41  | 1.40  | 1.45  | 1.39  | 1.42  | 1.51  | 1.40  | 1.43  | 0.04 |
| <b>4e</b> | 0.89  | 1.80  | 0.91  | 0.15  | 1.81  | 0.11  | 0.51  | 0.88  | 0.70 |
| <b>4f</b> | 0.39  | 0.37  | 0.35  | 0.31  | 0.36  | 0.30  | 0.35  | 0.35  | 0.03 |
| <b>4g</b> | 1.92  | 1.87  | 1.91  | 1.83  | 1.87  | 1.85  | 1.91  | 1.88  | 0.03 |
| <b>4h</b> | 0.20  | 0.16  | 0.18  | 0.16  | 0.18  | 0.21  | 0.17  | 0.18  | 0.02 |
| Heparin   |       |       |       |       |       |       |       |       |      |
| lyase 3   |       |       |       |       |       |       |       |       |      |
| <b>2a</b> | 43.19 | 42.69 | 43.46 | 49.78 | 43.50 | 52.05 | 39.76 | 44.92 | 4.3  |
| <b>2b</b> | 4.66  | 4.28  | 3.85  | 4.06  | 5.70  | 4.30  | 4.75  | 4.51  | 0.60 |
| <b>2e</b> | 12.76 | 12.73 | 11.99 | 11.60 | 12.25 | 11.77 | 14.25 | 12.48 | 0.90 |
| <b>2f</b> | 11.61 | 11.2  | 12.1  | 13.92 | 12.75 | 13.91 | 15.20 | 12.96 | 1.5  |
| <b>4e</b> | 13.17 | 0.86  | 13.76 | 16.24 | 3.30  | 17.12 | 12.09 | 10.93 | 6.3  |
| <b>4i</b> | 14.62 | 29.1  | 14.85 | 4.40  | 22.50 | 0.85  | 13.95 | 14.32 | 9.7  |

**Table S2**  $^1\text{H}$  and  $^{13}\text{C}$  chemical shifts for the tetrasaccharide standards <sup>a</sup>

|           | $^1\text{H}/\text{ppm}$ | $^{13}\text{C}/\text{ppm}$ |           | $^1\text{H}/\text{ppm}$ | $^{13}\text{C}/\text{ppm}$ |
|-----------|-------------------------|----------------------------|-----------|-------------------------|----------------------------|
| <b>4a</b> |                         |                            | <b>4f</b> |                         |                            |
| A1        | 5.450                   | 96.99                      | A1        | 5.074                   | 100.9                      |
| A2        | 4.523                   | 74.02                      | A2        | 3.733                   | 70.39                      |
| A3        | 4.137                   | 62.42                      | A3        | 4.153                   | 66.83                      |
| A4        | 5.918                   | 105.4                      | A4        | 5.724                   | 107.6                      |
| B1        | 5.301                   | 96.84                      | B1        | 5.324                   | 96.80                      |
| B2        | 3.193                   | 57.77                      | B2        | 3.863                   | 53.39                      |
| B3        | 3.544                   | 69.25                      | B3        | 3.723                   | 69.19                      |
| B4        | 3.696                   | 78.37                      | B4        | 3.773                   | 78.15                      |
| B5        | 3.811                   | 70.68                      | B5        | 3.943                   | 69.03                      |
| B6a       | 3.727                   | 60.06                      | B6a       | 4.373                   | 65.87                      |
| B6b       | 3.823                   | 60.06                      | B6b       | 4.103                   | 65.87                      |
| C1        | 5.111                   | 99.19                      | C1        | 4.573                   | 100.5                      |
| C2        | 4.222                   | 76.05                      | C2        | 3.353                   | 73.55                      |
| C3        | 4.149                   | 68.85                      | C3        | 3.593                   | 76.71                      |
| C4        | 3.980                   | 76.14                      | C4        | 3.703                   | 76.07                      |
| C5        | 4.693                   | 69.23                      | C5        | 3.693                   | 77.03                      |
| D1        | 5.370                   | 90.98                      | D1        | 5.364                   | 91.12                      |
| D2        | 3.159                   | 58.13                      | D2        | 3.353                   | 57.27                      |
| D3        | 3.612                   | 69.41                      | D3        | 4.463                   | 75.71                      |

---

|           |     |       |       |           |     |       |       |
|-----------|-----|-------|-------|-----------|-----|-------|-------|
|           | D4  | 3.627 | 77.38 |           | D4  | 3.943 | 73.11 |
|           | D5  | 3.847 | 70.49 |           | D5  | 3.943 | 71.23 |
|           | D6a | 3.823 | 60.05 |           | D6a | 3.853 | 60.10 |
|           | D6b | 3.823 | 60.05 |           | D6b | 3.763 | 60.10 |
| <b>4g</b> |     |       |       | <b>4h</b> |     |       |       |
|           | A1  | 5.080 | 100.9 |           | A1  | 5.074 | 101.0 |
|           | A2  | 3.729 | 70.49 |           | A2  | 3.703 | 70.65 |
|           | A3  | 4.168 | 66.94 |           | A3  | 4.193 | 67.21 |
|           | A4  | 5.728 | 107.7 |           | A4  | 5.714 | 107.8 |
|           | B1  | 5.348 | 96.74 |           | B1  | 5.544 | 97.32 |
|           | B2  | 3.859 | 53.40 |           | B2  | 3.233 | 57.89 |
|           | B3  | 3.737 | 69.22 |           | B3  | 3.603 | 69.49 |
|           | B4  | 3.786 | 77.94 |           | B4  | 3.793 | 77.63 |
|           | B5  | 3.949 | 69.05 |           | B5  | 3.941 | 68.80 |
|           | B6a | 4.380 | 65.90 |           | B6a | 4.395 | 65.82 |
|           | B6b | 4.103 | 65.90 |           | B6b | 4.094 | 65.82 |
|           | C1  | 4.551 | 100.9 |           | C1  | 4.573 | 101.0 |
|           | C2  | 3.306 | 73.61 |           | C2  | 3.328 | 72.84 |
|           | C3  | 3.615 | 76.67 |           | C3  | 3.762 | 76.74 |
|           | C4  | 3.721 | 76.32 |           | C4  | 3.695 | 76.97 |
|           | C5  | 3.696 | 77.09 |           | C5  | 3.757 | 76.19 |
|           | D1  | 5.373 | 91.20 |           | D1  | 5.364 | 91.20 |

---

---

|           |       |        |           |       |       |
|-----------|-------|--------|-----------|-------|-------|
| D2        | 3.363 | 56.95  | D2        | 3.373 | 56.99 |
| D3        | 4.421 | 75.56  | D3        | 4.405 | 75.58 |
| D4        | 3.940 | 73.32  | D4        | 3.946 | 73.28 |
| D5        | 4.144 | 69.12  | D5        | 4.141 | 69.16 |
| D6a       | 4.372 | 66.40  | D6a       | 4.368 | 66.39 |
| D6b       | 4.217 | 66.40  | D6b       | 4.221 | 66.39 |
| <b>4e</b> |       |        | <b>4i</b> |       |       |
| A1        | 5.264 | 101.0  | A1        | 5.254 | 101.0 |
| A2        | 3.893 | 69.33  | A2        | 3.906 | 69.11 |
| A3        | 4.063 | 65.61  | A3        | 4.053 | 65.69 |
| A4        | 5.844 | 107.19 | A4        | 5.834 | 107.1 |
| B1        | 4.603 | 104.0  | B1        | 4.603 | 104.0 |
| B2        | 3.651 | 70.18  | B2        | 3.641 | 70.10 |
| B3        | 3.794 | 81.50  | B3        | 3.792 | 81.56 |
| B4        | 4.026 | 68.11  | B4        | 4.023 | 68.25 |
| B5        | 3.633 | 74.93  | B5        | 3.630 | 74.91 |
| B6        | 3.732 | 61.03  | B6        | 3.717 | 61.07 |
| C1        | 4.453 | 101.3  | C1        | 4.453 | 101.4 |
| C2        | 3.598 | 69.75  | C2        | 3.593 | 69.77 |
| C3        | 3.759 | 82.07  | C3        | 3.763 | 82.02 |
| C4        | 4.107 | 68.43  | C4        | 4.113 | 68.65 |
| C5        | 3.633 | 74.93  | C5        | 3.630 | 74.91 |

---

|                 |       |       |                  |       |       |
|-----------------|-------|-------|------------------|-------|-------|
| C6              | 3.653 | 60.83 | C6               | 3.670 | 60.88 |
| D1              | 4.353 | 102.9 | D1               | 4.373 | 102.7 |
| D2              | 3.294 | 72.75 | D2               | 3.273 | 72.69 |
| D3              | 3.535 | 73.75 | D3               | 3.543 | 73.69 |
| D4              | 3.794 | 76.29 | D4               | 3.792 | 76.27 |
| D5ax            | 3.303 | 62.92 | D5ax             | 3.315 | 62.90 |
| D5eq            | 4.026 | 62.92 | D5eq             | 4.029 | 62.90 |
| CH <sub>a</sub> | 4.179 | 68.50 | SerCH- $\alpha$  | 3.729 | 54.95 |
| CH <sub>b</sub> | 3.984 | 68.50 | SerCH- $\beta$ a | 4.092 | 69.50 |
| CH <sub>c</sub> | 3.533 | 49.16 | SerCH- $\beta$ b | 3.876 | 69.50 |

<sup>a</sup> The chemical shifts listed above are observed from HMQC spectra, the protons of acetyl groups resonance at 2.03 ppm are not shown.

**Table S3** Molecular Weight and Activity Assay of Heparin and Low Molecular Weight Heparin

| Sample               | Number<br>Average<br>Molecular<br>Weight, $M_N$<br>$\pm$ SD (Da) <sup>a</sup> | Weight<br>Average<br>Molecular<br>Weight, $M_W$<br>$\pm$ SD (Da) <sup>a</sup> | Polydispersity<br>Index, PDI | aPTT<br>(s) <sup>b</sup> | IIa<br>(relative<br>activity) <sup>b</sup> | Xa<br>(relative<br>activity) <sup>b</sup> |
|----------------------|-------------------------------------------------------------------------------|-------------------------------------------------------------------------------|------------------------------|--------------------------|--------------------------------------------|-------------------------------------------|
| Heparin              | 8300 $\pm$ 200                                                                | 12000 $\pm$ 300                                                               | 1.4                          | 220                      | 1.3                                        | 1.0                                       |
| LMWH<br>(commercial) | 4800 $\pm$ 150                                                                | 7200 $\pm$ 200                                                                | 1.5                          | 52                       | 1.0                                        | 2.6                                       |
| LMWH<br>(novel)      | 5300 $\pm$ 200                                                                | 7700 $\pm$ 100                                                                | 1.4                          | 60                       | 1.0                                        | 1.4                                       |

a. Three independent determinations.

b. Value  $\pm$ 5%

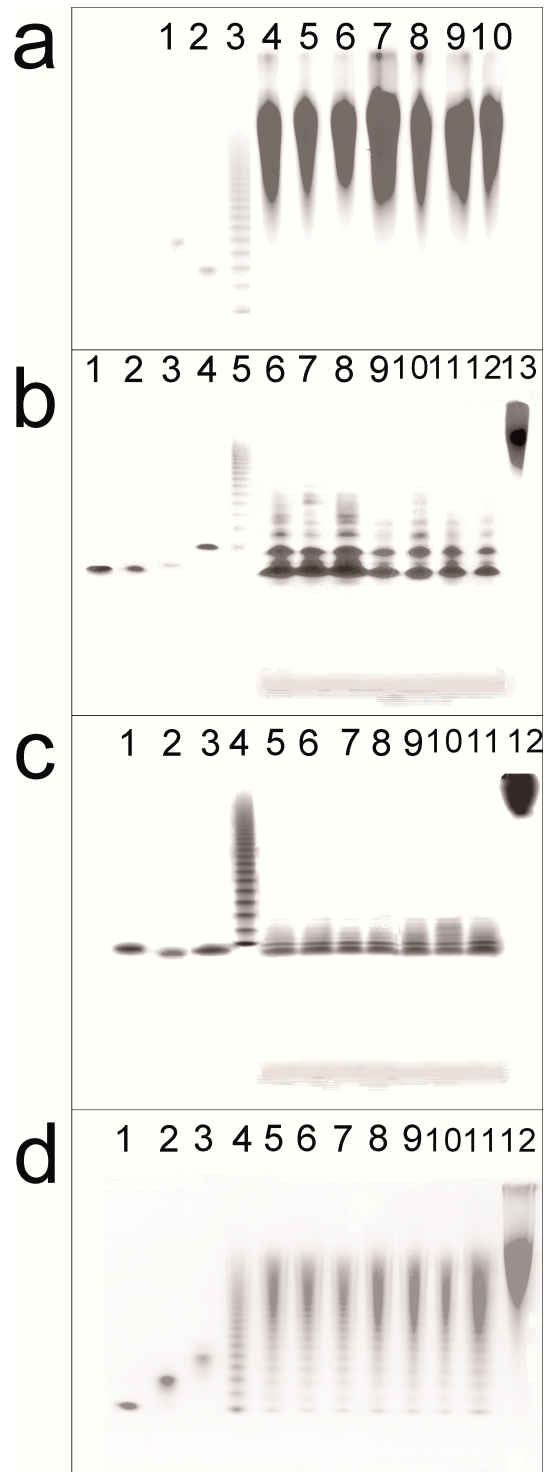

Figure S1 PAGE analysis of untreated heparins and heparin lyases treated heparins. Panel a is 15% PAGE gel analysis of the untreated seven pharmaceutical heparins, Panel b and panel c are 22% PAGE gels analysis of heparins exhaustively digested by heparin lyase 1 and heparin lyase 2, respectively. Panel d is 15% PAGE gel analysis of heparin lyase 3 treated heparins. Oligosaccharide standards, bovine heparin ladder and untreated heparin are used in these gels as controls. The faint bands at the bottoms of panel b and panel c are disaccharides stained by the mixture of alcian Blue and azure A.



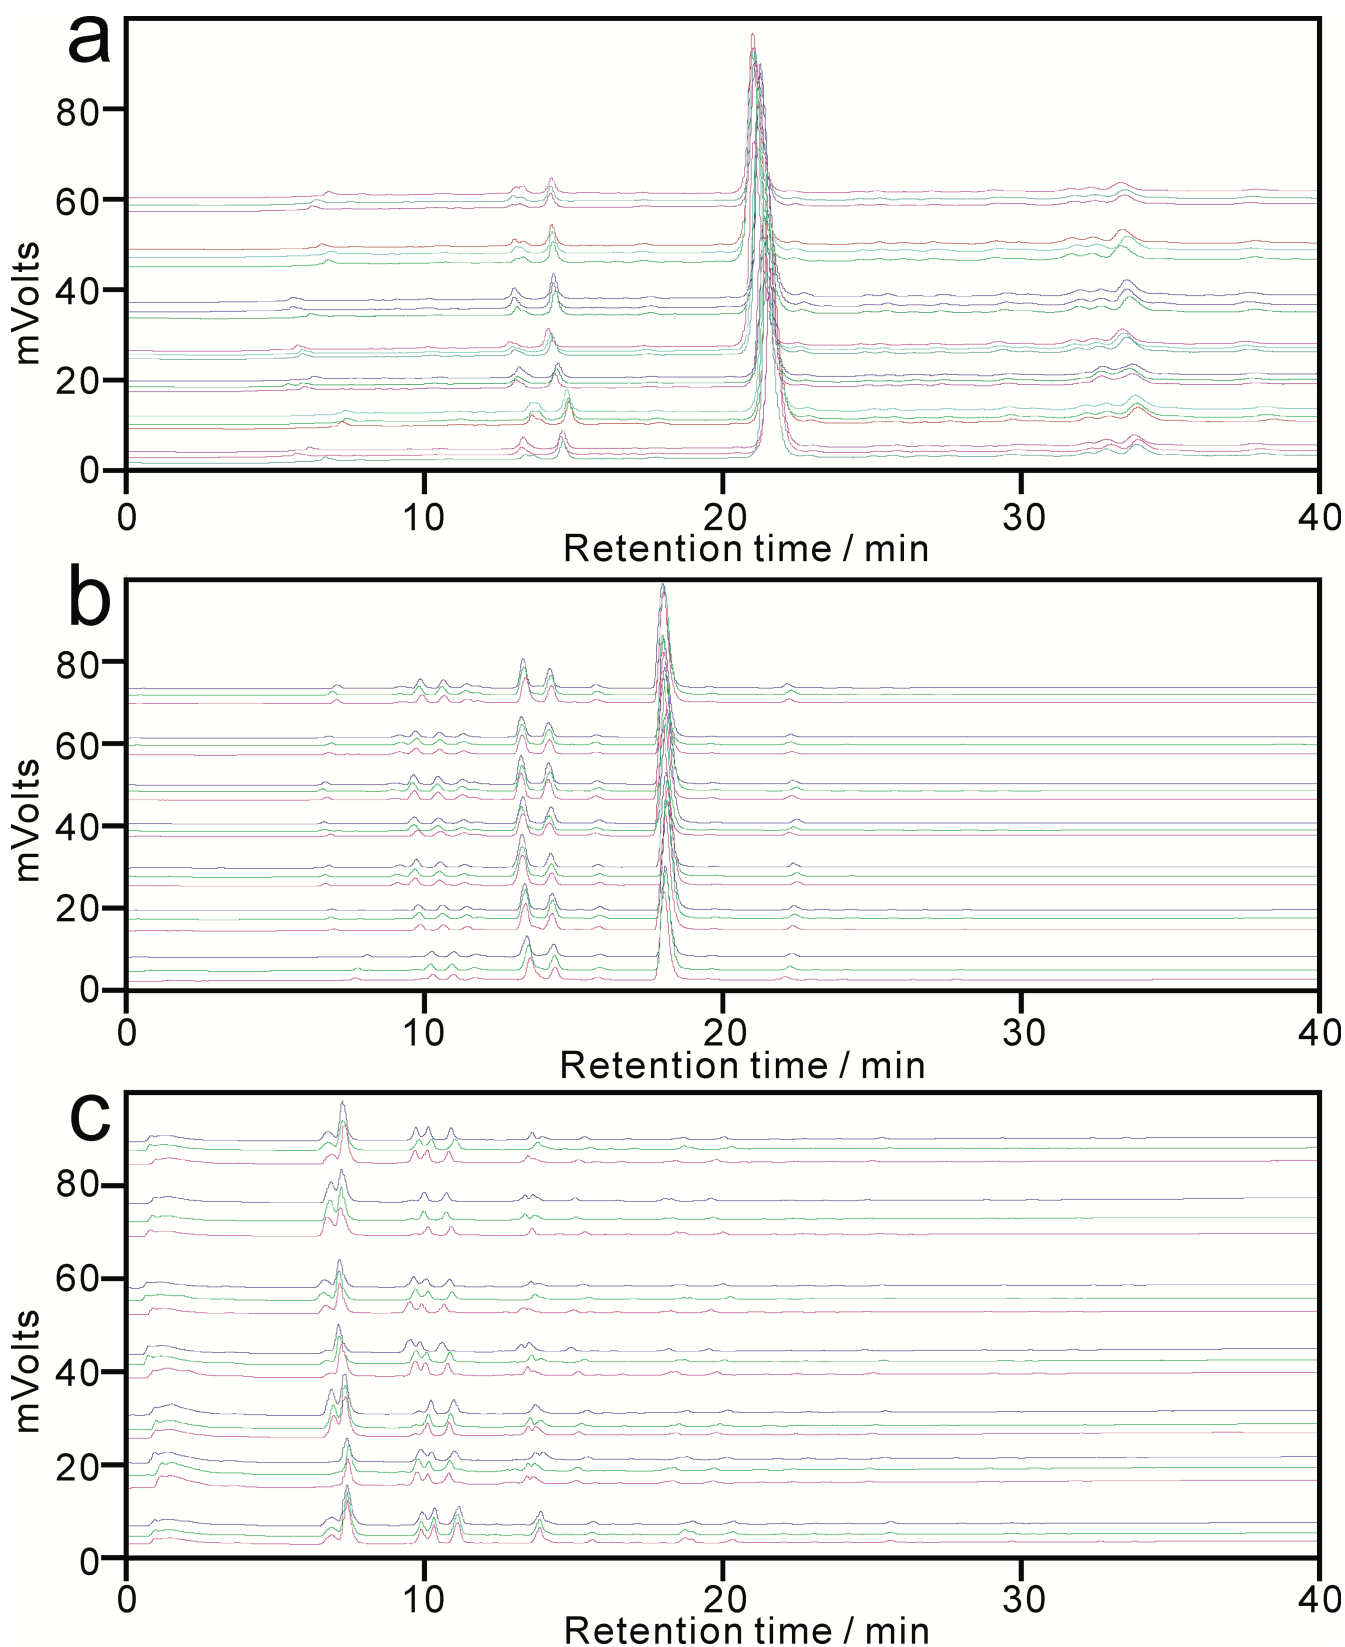

Figure S2 Chromatogram of heparins treated by heparin lyases. Panels a, b and c are SAX-HPLC analysis of the seven pharmaceutical heparins excessively digested by heparin lyase 1, heparin lyase 2 and heparin lyase 3, respectively. Each sample is analyzed in triplicate.

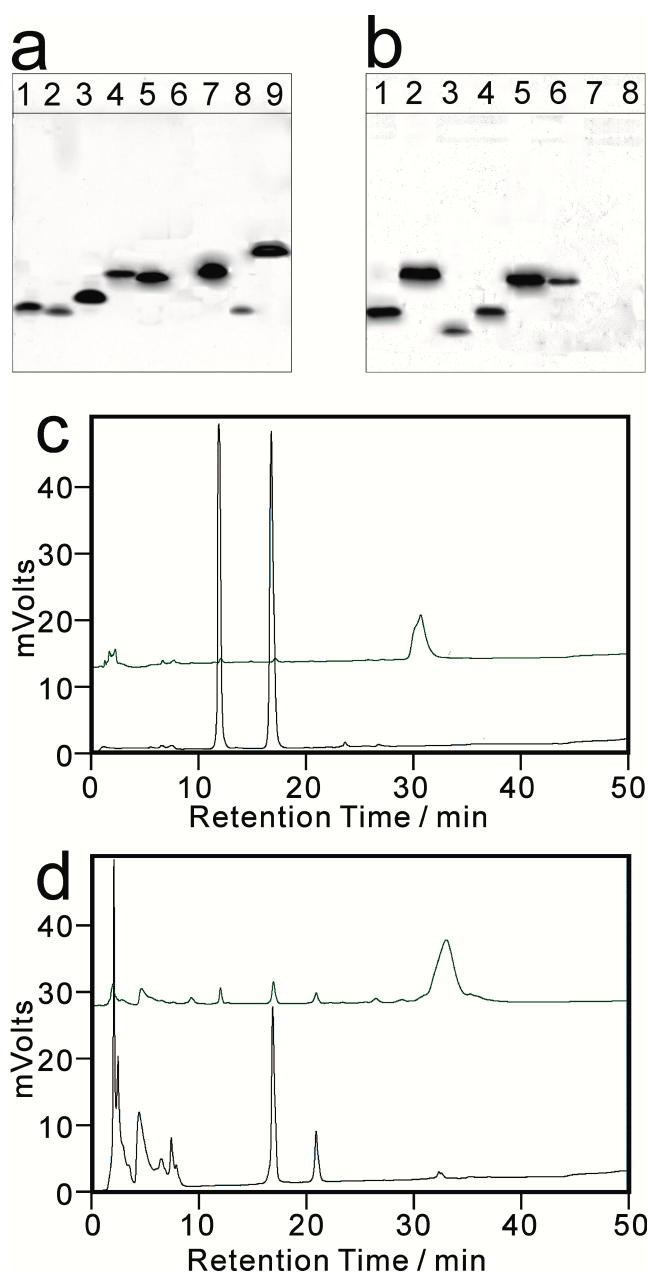

Figure S3 PAGE and SAX-HPLC analysis of oligosaccharides treated by heparin lyase 3. Panel a, lane 1 through lane 5 are untreated standards, lane 1 is **4c**, lane 2 is **4g**, lane 3 is **4d**, lane 4 is **6b** and lane 5 is **6a**. Lanes 6 through 9 are oligosaccharides incubated with excess heparin lyase 3. Lane 6 is **4c**, lane 7 is **6b**, lane 8 is **6a** and lane 9 is **8a**. Panel b, lane 1 is standard **4c**, lane 2 is standard **6c**, lane 3 is heparin lyase 1 treated **6c**, lane 4 is heparin lyase 3 treated **6c**, lane 5 is standard **6d**, lanes 6 through 8 are **6d** treated by heparin lyase 1, heparin lyase 2 and heparin lyase 3, respectively. Lane 7 and lane 8 are **6d** digested to disaccharides which are not able to be stained either by Alcian Blue or silver nitrate. Panel c is SAX-HPLC analysis of **6b** (upper) and **4c** (lower) treated by heparin lyase 3. Panel d is SAX-HPLC analysis of **8a** (upper) and **6a** (lower) treated by heparin lyase 3.

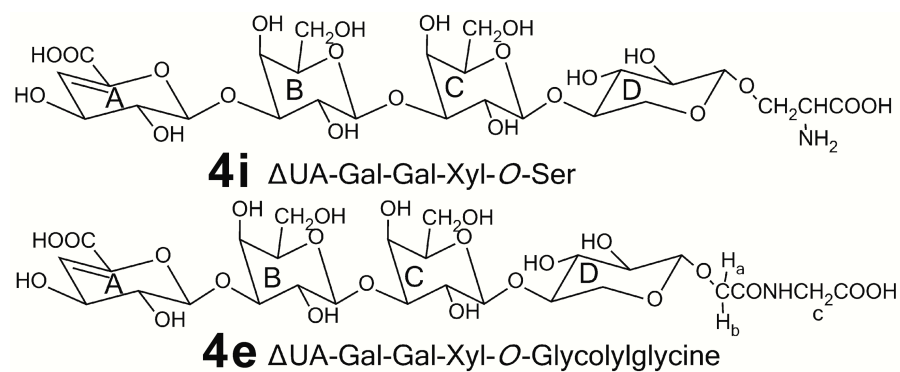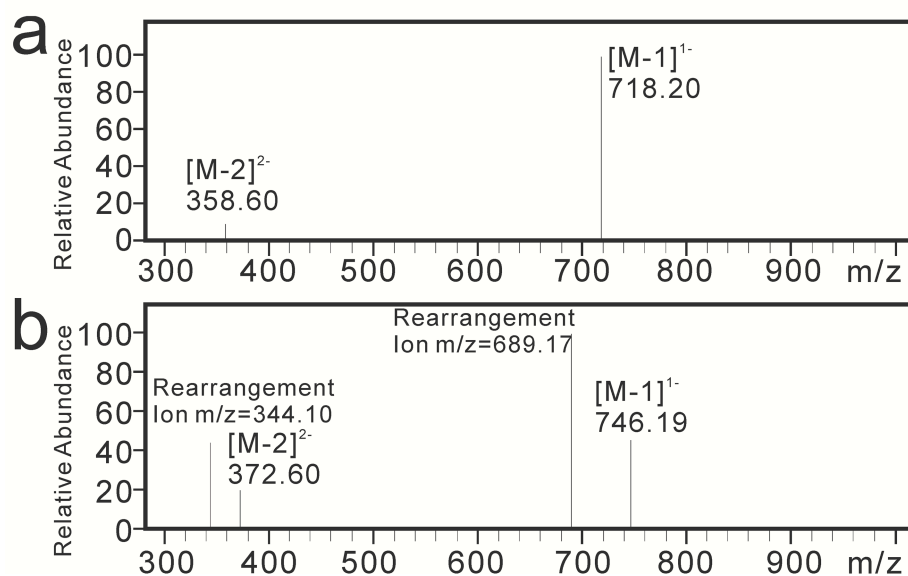

Figure S4 Structures and Mass Spectra of **4i** and **4e**. The structures of **4i** and **4e** with labels in the schematics shown here are corresponding to the explanation in the body of the paper and **Table S1** in the supporting information section. Panel a and panel b are the mass spectra for **4i** and **4e**, respectively.

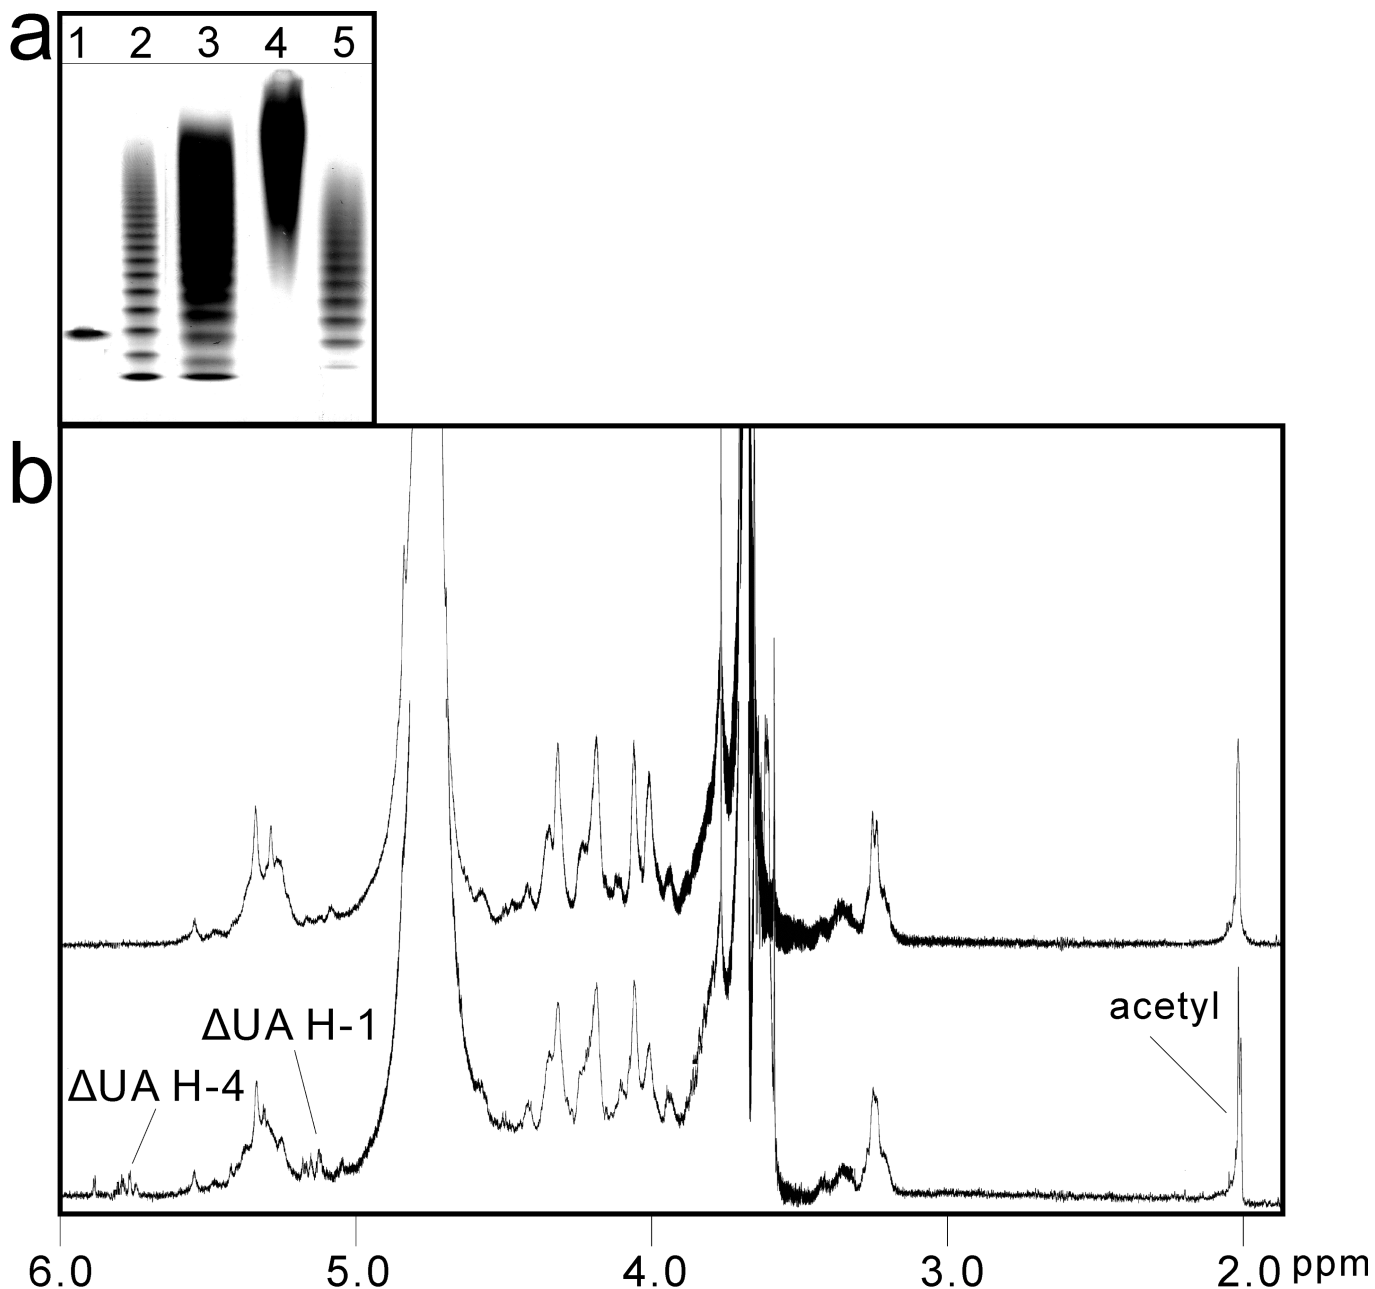

Figure S5 PAGE analysis and 1D NMR spectra of the new low molecular weight heparin and the heparin control. Panel a is 15% PAGE gel analysis of the new LMWH (lane 3), lane 1 is heparin dp10, lane 2 is bovine heparin ladder, lane 4 is untreated heparin and lane 5 is a commercial LMWH. Panel b shows the 1D NMR spectra of heparin treated with deactivated heparin lyase 3 (upper) and the new LMWH (lower).  $\Delta$ UA H-1 and  $\Delta$ UA H-4 stand for the signals of H-1 and H-4 in the unsaturated uronic acid residues at the non-reducing terminal of heparin derived oligosaccharides.
